# Supplementary material for: Red blood cell transfusion in palliative care patients with oncohematological disease
Source: Research Square preprint supplement (doi:10.21203/rs.3.rs-1459959/v1), 2022-04-19
Supplement: Supplementary file 1 [file 8bd0e85280022d1fc8310093.xlsx]

## Sheet: Características gerais
Nome	HC	Data Transfusão	Diagnóstico	tratamentos	fase doença	idade	sexo	IMC	comorbidades	Medicações em uso	PPS	indicação transfusão	Hb pré	Tipo CH	nº bolsas	Observações
Amalia Rodrigues da Silva	3265582	2020-02-12	LMA/ SMD	azacitidina/ Ara-C sc	doença em progressão	83	F	20.34	osteoporose, doença venosa periférica, labirintite	Labirin, domperidona, alendronato e vit D	60	astenia, cansaço	7.3	feno/ desleuco/ irradiado	1	sem intercorrências
Climeria Maria Madalena	3917680	2020-03-09	LLC	FC/ clorambucil + pred/COP	doença em progressão	78	F	21.25	DM, TVP	Metformina e glibenclamida	80	astenia, cansaço	7.2	feno/desleuco/irradiado	1	sem intercorrências
Maria Eunice Alves Jesus Souza	11495872	2020-05-14	SMD ARSA e adenoCA coléduco	EPO? Deferasirox, capecitabina	doença estável	61	F	19	Hipotireoidismo	Eutirox, capecitabina	80	astenia, cansaço	7.1	feno/desleuco/lavado/irradiado	2	sem intercorrências
Alfredo Barbosa da Silva	3636557	2020-06-30	SMD	EPO, quelante Ferro	doença estável, ver novo mielo	73	M	23.04	osteoartrose de joelhos	nega	90	astenia	8	feno/ desleuco	1	sem intercorrências
Luiz Carlos da Silva	11616854	2020-07-01	Mieloma Múltiplo	TCH autólogo/ alogenico, QTX	doença em progressão	53	M	23.18	nega	aciclovir, amitriptilina, morfina, prednisona 20 mg, ciclofosfamida 50 mg	80	astenia	6	desleucocitado/irradiado	2	sem intercorrências
Vera Lucia Santos de Souza	12533011	2020-07-14	mielofibrose/ LMA	araC	doença em progressão	50	F	21.09	DM, HAS	insulina, glicazida, metformina, omeprazol, enalapril, citalopram	70	astenia	5.9	desleucocitado/ irradiado	2	sem intercorrências
Jose Carlos Ribas D'Avila	12797796	2020-07-07	mielofibrose	hydrea	doença estável	62	M	25.15	DM, HAS, ex tabagista, ex etilista	metformina, insulina NPH, AAS, anlodipina	90	astenia	6.9	feno/ desleucocitado	2	sem intercorrências
Francisca Rodrigues da Rocha	13363334	2020-07-07	LMA recidiva	QTX indução	doença em progressão	59	F	16.38	HAS	Atenolol, ciprofloxacin, aciclovir, itraconazol	90	astenia	6.4	desleucocitado/ irradiado	2	sem intercorrências
José Aparecido de Souza	12181612	2020-07-13	mielofibrose	hydrea	doença estável	84	M	17.99	HAS, doença neurodegenerativa	hydrea, captopril	50	astenia, fraqueza	6.8	desleucocitado/ fenotipado	2	sem intercorrências
Geny Marques Barbosa	10745828	2020-07-22	mieloma multiplo	melfalan, prednisona, talidomida, bortezomibe	doença estável	81	F	12.11	HAS, DM, OSTEONECROSE DE MANDÍBULA	ciclofosfamida, prednisona, tylex, mirtazapina	60	astenia, fraqueza	6.6	desleucocitado/ irradiado	1	sem intercorrências
Milene Aparecida Santarosa Bonassi	13402582	2020-08-04	LMC crise blástica	dasatinib, QTX indução (ARA C e dauno)	doença em progressão	54	F	18.3	retocolite ulcerativa	dasatinib, itraconazol, mesalazina	70	astenia, fraqueza	5.8	desleucocitado/ irradiado	2	sem intercorrências
Jair José Furlani	13563697	2020-08-25	LMA/SMD	sem tto específico	doença em progressão	83	M	24.66	nega	Bactrim, aciclovir, transamin	60	astenia, fraqueza	6.4	desleucocitado/ irradiado	1	sem intercorrências
Luiz Antonio de Souza Piai	13533953	2020-08-28	LMA/SMD	transamin ainda não iniciou QTX	doença em progressão	45	M	25.26	asma	alenia, transamin, polivitaminico	70	astenia	7	desleucocitado/ irradiado	1	sem intercorrências

## Sheet: Plan1
Paciente	Idade	sexo	IMC	diagnóstico	fase da doença	comorbidades	PPS	Hb pré-transfusão (g/dl)
1	83	F	20	LMA secundária a SMD	doença em progressão	osteoporose, doença venosa periférica	60	7.3
2	78	F	21	LLC	doença em progressão	DM, TVP	80	7.2
3	61	F	19	SMD + adenocarcinoma de coléduco	doença estável	Hipotireoidismo	80	7.1
4	73	M	23	SMD	doença estável	osteoartrose de joelhos	90	8
5	53	M	23	Mieloma Múltiplo	doença em progressão	-	80	6
6	50	F	21	LMA secundária a Mielofibrose Primária	doença em progressão	DM, HAS	70	5.9
7	62	M	25	Mielofibrose Primária	doença estável	DM, HAS, ex tabagista, ex etilista	90	6.9
8	59	F	16	LMA	doença em progressão	HAS	90	6.4
9	84	M	18	Mielofibrose Primária	doença estável	HAS, doença neurodegenerativa	50	6.8
10	81	F	12	Mieloma Múltiplo	doença estável	HAS, DM, OSTEONECROSE DE MANDÍBULA	60	6.6
11	54	F	18	LMC crise blástica	doença em progressão	retocolite ulcerativa	70	5.8
12	83	M	25	LMA secundária a SMD	doença em progressão	-	60	6.4
13	45	M	25	LMA secundária a SMD	doença em progressão	-	70	7

## Sheet: Escalas
Nome: Amalia Rodrigues da Silva	D0	D+2	D+7		D0	D+2	D+7
Dor	0	0	0	Banhar-se	1	1	1		Percepção: sem alteração pós transfusão
Cansaço	4	4	3	Vestir-se	0	0	0
Nausea	3	0	0	Ir ao banheiro	1	1	1
Depressão	3	2	3	Transferência	1	1	1
Ansiedade	4	0	3	Continência	1	1	1
Sonolência	4	3	4	Alimentação	1	1	1
Apetite	4-5	3	2
Falta de ar	4	4	3
Bem estar	5	3	2
Nome: Climeria Maria Madalena	D0	D+2	D+7		D0	D+2	D+7		Percepção: melhor disposição para caminhar
Dor	0	0	0	Banhar-se	1	1	1
Cansaço	5	3	2	Vestir-se	1	1	1
Nausea	0	0	0	Ir ao banheiro	1	1	1
Depressão	1	2	1	Transferência	1	1	1
Ansiedade	2	4	3	Continência	1	1	1
Sonolência	3	2	4	Alimentação	1	1	1
Apetite	3	3	3
Falta de ar	0	1	4
Bem estar	0	2	5
Nome: Maria Eunice Alves Jesus de Souza	D0	D+2	D+7		D0	D+2	D+7
Dor (dor no corpo)	2	1	1	Banhar-se	1	1	1		Percepçâo: melhora do estado geral
Cansaço	3	2	3	Vestir-se	1	1	1
Nausea	0	0	0	Ir ao banheiro	1	1	1
Depressão	3	2	2	Transferência	1	1	1
Ansiedade	2	3	4	Continência	1	1	1
Sonolência	0	0	0	Alimentação	1	1	1
Apetite	5	2	4
Falta de ar	3	2	2
Bem estar	4	0	4
Nome: Alfredo Barbosa da Silva	D0	D+2	D+7		D0	D+2	D+7
Dor (nos joelhos)	7	10	7	Banhar-se	1	1	1
Cansaço	4	4	1	Vestir-se	1	1	1		percepção: sem melhora nos sintomas
Nausea	0	0	0	Ir ao banheiro	1	1	1
Depressão	0	0	0	Transferência	1	1	1
Ansiedade	0	0	0	Continência	1	1	1
Sonolência	0	2	0	Alimentação	1	1	1
Apetite	0	0	0
Falta de ar	0	0	0
Bem estar	0	6	2
Nome: Luiz Carlos da Silva	D0	D+2	D+7		D0	D+2	D+7
Dor	6	0	1	Banhar-se	1	1	1		refere melhora do cansaço e da falta de ar com a transfusão
Cansaço	5	0	1	Vestir-se	1	1	1		paciente medicado com morfina com melhora da dor
Nausea	0	0	0	Ir ao banheiro	1	1	1
Depressão	0	0	0	Transferência	1	1	1
Ansiedade	5	5	4	Continência	1	1	1
Sonolência	4	0	0	Alimentação	1	1	1
Apetite	0	0	0
Falta de ar	4	1	1
Bem estar	5	0	0
Nome: Vera Lucia Santos de Souza	D0	D+2	D+7		D0	D+2	D+7		percepção: melhora da fraqueza
Dor	0	0	0	Banhar-se	1	1	1
Cansaço	7	3	0	Vestir-se	1	1	1
Nausea	10	4	4	Ir ao banheiro	1	1	1
Depressão	3	0	4	Transferência	1	1	1
Ansiedade	2	2	0	Continência	1	1	1
Sonolência	0	0	0	Alimentação	1	1	1
Apetite	8	5	5
Falta de ar	0	0	0
Bem estar	2	4	3
Nome: José Carlos Ribas D'Avila	D0	D+2	D+7		D0	D+2	D+7
Dor	2	2	1	Banhar-se	1	1	1		precepção: sem percepção de melhora
Cansaço	2	2	0	Vestir-se	1	1	1
Nausea	0	0	0	Ir ao banheiro	1	1	1
Depressão	3	0	0	Transferência	1	1	1
Ansiedade	0	0	0	Continência	1	1	1
Sonolência	2	0	2	Alimentação	1	1	1
Apetite	2	2	0
Falta de ar	0	0	0
Bem estar	1	0	0
Nome: Francisca Rodrigues da Rocha	D0	D+2	D+7		D0	D+2	D+7		percepção: melhora da astenia
Dor	4 (cefaléia)	0	3 (ombro/corpo)	Banhar-se	1	1	1
Cansaço	5	0	0	Vestir-se	1	1	1
Nausea	0	0	0	Ir ao banheiro	1	1	1
Depressão	0	0	0	Transferência	1	1	1
Ansiedade	0	0	0	Continência	1	1	1
Sonolência	5	0	3	Alimentação	1	1	1
Apetite	0	0	0
Falta de ar	0	0	3
Bem estar	4	0	2
Nome: José Aparecido de Souza	D0	D+2	D+7		D0	D+2	D+7
Dor	0	0	5	Banhar-se	0	0	0		impressão subjetiva: melhora da fraqueza
Cansaço	2	0	5	Vestir-se	0	0	0
Nausea	0	0	0	Ir ao banheiro	0	0	0
Depressão	0	2	2	Transferência	1	1	1
Ansiedade	0	0	0	Continência	0	0	0
Sonolência	0	0	0	Alimentação	1	1	1
Apetite	10	9	9
Falta de ar	0	0	0
Bem estar	2	5	7
Nome: Geny Marques Barbosa	D0	D+2	D+7		D0	D+2	D+7
Dor	2	0	3	Banhar-se	1	1	1		dor em osteonecrose de mandíbula
Cansaço	2	0	0	Vestir-se	1	1	1		suspenso tylex
Nausea	0	0	0	Ir ao banheiro	1	1	1
Depressão	10	5	1	Transferência	1	1	1
Ansiedade	10	5	0	Continência	1	1	1
Sonolência	0	0	0	Alimentação	1	1	1
Apetite	0	0	0
Falta de ar	0	0	0
Bem estar	0	0	0
Nome: Milene Ap. Santarosa Bonasse	D0	D+2	D+7		D0	D+2	D+7
Dor	2	0	2	Banhar-se	1	1	1		dor no abdome (baço)
Cansaço	7	2	4	Vestir-se	1	1	1		percepção: melhora do cansaço e da nausea
Nausea	7	2	4	Ir ao banheiro	1	1	1
Depressão	7	0	1	Transferência	1	1	1
Ansiedade	5	0	1	Continência	1	1	1
Sonolência	8	2	4	Alimentação	1	1	1
Apetite	7	5	4
Falta de ar	3	0	1
Bem estar	5	3	4
Nome: Jair Jose Furlani	D0	D+2	D+7		D0	D+2	D+7
Dor	3	0	0	Banhar-se	1	1	1		dor nas pernas, no corpo
Cansaço	6	5	5	Vestir-se	0	0	0		percepção: sem emlhora de sintomas
Nausea	0	0	8	Ir ao banheiro	1	1	1
Depressão	5	0	5	Transferência	1	1	1
Ansiedade	0	0	3	Continência	1	1	1
Sonolência	5	6	2	Alimentação	1	1	1
Apetite	4	6	7
Falta de ar	0	0	0
Bem estar	2	2	5
Nome: Luiz Antonio de Souza Piai	D0	D+2	D+7		D0	D+2	D+7
Dor	0	0	0	Banhar-se	1	1	1
Cansaço	0	0	5	Vestir-se	1	1	1		melhora da astenia, fulgaz
Nausea	0	0	0	Ir ao banheiro	1	1	1
Depressão	0	0	0	Transferência	1	1	1
Ansiedade	0	0	0	Continência	1	1	1
Sonolência	5	5	5	Alimentação	1	1	1
Apetite	5	3	5
Falta de ar	5	0	0
Bem estar	3	2	5
Nome:	D0	D+2	D+7		D0	D+2	D+7
Dor				Banhar-se
Cansaço				Vestir-se
Nausea				Ir ao banheiro
Depressão				Transferência
Ansiedade				Continência
Sonolência				Alimentação
Apetite
Falta de ar
Bem estar
Nome:	D0	D+2	D+7		D0	D+2	D+7
Dor				Banhar-se
Cansaço				Vestir-se
Nausea				Ir ao banheiro
Depressão				Transferência
Ansiedade				Continência
Sonolência				Alimentação
Apetite
Falta de ar
Bem estar
